# Supplementary material for: Comparative Analysis of Human B Cell Epitopes Based on BCG Genomes
Source: Hindawi journal article supplement (doi:10.1155/2016/3620141), 2016-01-01
Supplement: f1 [file 3620141.f1.pdf]

Table S1 15 genome sequences analyzed in this study

| Strain                                  | Size (Mb) | GC%  | Accession     | Reference |
|-----------------------------------------|-----------|------|---------------|-----------|
| BCG-Moreau                              | 4.16      | 65.4 | AKYS000000000 | 16        |
| BCG-Phipps                              | 4.14      | 65.4 | AKYT000000000 | 16        |
| BCG-Sweden                              | 4.09      | 65.3 | AKYV000000000 | 16        |
| BCG-Prague                              | 4.13      | 65.3 | AKYU000000000 | 16        |
| BCG-Glaxo                               | 4.21      | 65.4 | AKYR000000000 | 16        |
| BCG-Frappier                            | 4.24      | 65.5 | AKYQ000000000 | 16        |
| BCG-China                               | 4.18      | 65.3 | AEZE000000000 | 17        |
| BCG-Danish                              | 4.17      | 65.3 | AEZF000000000 | 17        |
| BCG-Russia                              | 4.18      | 65.3 | AEZG000000000 | 17        |
| BCG-Tice                                | 4.17      | 65.3 | AEZH000000000 | 17        |
| BCG-Mexico                              | 4.35      | 65.7 | NC_016804     | 18        |
| BCG-Pasteur                             | 4.37      | 65.6 | NC_008769     | 19        |
| BCG-Tokyo 172                           | 4.37      | 65.6 | NC_012207     | 20        |
| <i>Mycobacterium tuberculosis</i> H37Rv | 4.41      | 65.6 | NC_000962     | 21        |
| <i>Mycobacterium bovis</i> AF2122/97    | 4.35      | 65.6 | NC_002945     | 22        |

Table S2 399 B cell epitopes and coding genes

| No. | Epitope ID | Coding Gene according to H37Rv | Coding Gene according to AF2122/97 gene | Epitope linear Sequence |
|-----|------------|--------------------------------|-----------------------------------------|-------------------------|
| 1   | 103203     | <i>Rv0066c</i>                 | <i>Mb0067c</i>                          | GELDNREGSQFYLAMV        |
| 2   | 103328     | <i>Rv0066c</i>                 | <i>Mb0067c</i>                          | KTLDAAGKLLDNDK          |
| 3   | 103550     | <i>Rv0066c</i>                 | <i>Mb0067c</i>                          | RIFYKDAFAKHQELF         |
| 4   | 103745     | <i>Rv0066c</i>                 | <i>Mb0067c</i>                          | YEEQMQDAFETGVMF         |
| 5   | 103113     | <i>Rv0125</i>                  | <i>Mb0130</i>                           | DRFADFPALPLDPSA         |
| 6   | 103680     | <i>Rv0125</i>                  | <i>Mb0130</i>                           | TWQTKSGGTRTGNVT         |
| 7   | 103040     | <i>Rv0169</i>                  | <i>Mb0175</i>                           | ALTGLGDKFGESIVN         |
| 8   | 103544     | <i>Rv0251c</i>                 | <i>Mb0257c</i>                          | RGEHRDEHTQDAGDK         |
| 9   | 103580     | <i>Rv0287</i>                  | <i>Mb0295</i>                           | SAFAAKAGLMRHTIG         |
| 10  | 38988      | <i>Rv0288</i>                  | <i>Mb0296</i>                           | LQSLGAEIAVEQAAL         |
| 11  | 103042     | <i>Rv0288</i>                  | <i>Mb0296</i>                           | AMEDLVRAYHAMSST         |
| 12  | 103043     | <i>Rv0288</i>                  | <i>Mb0296</i>                           | AMMARDTAEAAKWGG         |
| 13  | 41952      | <i>Rv0315</i>                  | <i>Mb0323</i>                           | MLGTGTPNRARINFNC        |
| 14  | 53107      | <i>Rv0350</i>                  | <i>Mb0358</i>                           | RAGRCPPR                |
| 15  | 53303      | <i>Rv0350</i>                  | <i>Mb0358</i>                           | RCPPRRRA                |
| 16  | 73020      | <i>Rv0350</i>                  | <i>Mb0358</i>                           | WRCPPRRR                |
| 17  | 48905      | <i>Rv0350</i>                  | <i>Mb0358</i>                           | PPRRRAGR                |
| 18  | 6825       | <i>Rv0350</i>                  | <i>Mb0358</i>                           | CPPRRRAG                |
| 19  | 49246      | <i>Rv0350</i>                  | <i>Mb0358</i>                           | PRRRRAGRC               |
| 20  | 55523      | <i>Rv0350</i>                  | <i>Mb0358</i>                           | RRRAGRCPP               |
| 21  | 55706      | <i>Rv0350</i>                  | <i>Mb0358</i>                           | RRRAGRCPP               |

|    |       |               |               |          |
|----|-------|---------------|---------------|----------|
| 22 | 63850 | <i>Rv0350</i> | <i>Mb0358</i> | TGHWRCPP |
| 23 | 25138 | <i>Rv0350</i> | <i>Mb0358</i> | HWRCPPRR |
| 24 | 61020 | <i>Rv0350</i> | <i>Mb0358</i> | SSGCVTGH |
| 25 | 20198 | <i>Rv0350</i> | <i>Mb0358</i> | GHWRCPPR |
| 26 | 61340 | <i>Rv0350</i> | <i>Mb0358</i> | SSSGCVTG |
| 27 | 55967 | <i>Rv0350</i> | <i>Mb0358</i> | RSSSGCVT |
| 28 | 71325 | <i>Rv0350</i> | <i>Mb0358</i> | VTGHWRCP |
| 29 | 7311  | <i>Rv0350</i> | <i>Mb0358</i> | CVTGHWRC |
| 30 | 819   | <i>Rv0350</i> | <i>Mb0358</i> | AEAEGGTW |
| 31 | 11021 | <i>Rv0350</i> | <i>Mb0358</i> | EAEGGTWR |
| 32 | 948   | <i>Rv0350</i> | <i>Mb0358</i> | AEGGTWRI |
| 33 | 1634  | <i>Rv0350</i> | <i>Mb0358</i> | AGPGVAGS |
| 34 | 1676  | <i>Rv0350</i> | <i>Mb0358</i> | AGSGASDL |
| 35 | 4364  | <i>Rv0350</i> | <i>Mb0358</i> | ASDLRSSS |
| 36 | 7474  | <i>Rv0350</i> | <i>Mb0358</i> | DAAVAEAE |
| 37 | 9268  | <i>Rv0350</i> | <i>Mb0358</i> | DLRSSSGC |
| 38 | 10406 | <i>Rv0350</i> | <i>Mb0358</i> | DTLNKVDA |
| 39 | 11057 | <i>Rv0350</i> | <i>Mb0358</i> | EAGPGVAG |
| 40 | 11451 | <i>Rv0350</i> | <i>Mb0358</i> | EDTLNKVD |
| 41 | 12182 | <i>Rv0350</i> | <i>Mb0358</i> | EGGTWRIG |
| 42 | 12688 | <i>Rv0350</i> | <i>Mb0358</i> | EKFVKEQR |
| 43 | 15991 | <i>Rv0350</i> | <i>Mb0358</i> | FGHQVGDG |
| 44 | 18764 | <i>Rv0350</i> | <i>Mb0358</i> | GASDLRSS |
| 45 | 19202 | <i>Rv0350</i> | <i>Mb0358</i> | GEAGPGVA |
| 46 | 20060 | <i>Rv0350</i> | <i>Mb0358</i> | GGTWRIGY |
| 47 | 20174 | <i>Rv0350</i> | <i>Mb0358</i> | GHQVGDGE |

|    |       |               |               |          |
|----|-------|---------------|---------------|----------|
| 48 | 21653 | <i>Rv0350</i> | <i>Mb0358</i> | GPGVAGSG |
| 49 | 22332 | <i>Rv0350</i> | <i>Mb0358</i> | GSGASDLR |
| 50 | 22398 | <i>Rv0350</i> | <i>Mb0358</i> | GSKVPEDT |
| 51 | 22912 | <i>Rv0350</i> | <i>Mb0358</i> | GVAGSGAS |
| 52 | 23337 | <i>Rv0350</i> | <i>Mb0358</i> | GYFGHQVG |
| 53 | 24658 | <i>Rv0350</i> | <i>Mb0358</i> | HQVGDGEA |
| 54 | 26348 | <i>Rv0350</i> | <i>Mb0358</i> | IGYFGHQV |
| 55 | 30877 | <i>Rv0350</i> | <i>Mb0358</i> | KFVKEQRE |
| 56 | 34154 | <i>Rv0350</i> | <i>Mb0358</i> | KVPEDTLN |
| 57 | 38259 | <i>Rv0350</i> | <i>Mb0358</i> | LNKVDAAV |
| 58 | 39216 | <i>Rv0350</i> | <i>Mb0358</i> | LRSSSGCV |
| 59 | 40649 | <i>Rv0350</i> | <i>Mb0358</i> | LVYQTEKF |
| 60 | 44613 | <i>Rv0350</i> | <i>Mb0358</i> | NKVDAAVA |
| 61 | 47260 | <i>Rv0350</i> | <i>Mb0358</i> | PEDTLNKV |
| 62 | 47769 | <i>Rv0350</i> | <i>Mb0358</i> | PGVAGSGA |
| 63 | 52501 | <i>Rv0350</i> | <i>Mb0358</i> | QTEKFVKE |
| 64 | 52698 | <i>Rv0350</i> | <i>Mb0358</i> | QVGDGEAG |
| 65 | 54157 | <i>Rv0350</i> | <i>Mb0358</i> | RIGYFGHQ |
| 66 | 57244 | <i>Rv0350</i> | <i>Mb0358</i> | SDLRSSSG |
| 67 | 57981 | <i>Rv0350</i> | <i>Mb0358</i> | SGASDLRS |
| 68 | 58963 | <i>Rv0350</i> | <i>Mb0358</i> | SKVPEDTL |
| 69 | 63420 | <i>Rv0350</i> | <i>Mb0358</i> | TEKFVKEQ |
| 70 | 64980 | <i>Rv0350</i> | <i>Mb0358</i> | TLNKVDAA |
| 71 | 67616 | <i>Rv0350</i> | <i>Mb0358</i> | VAGSGASD |
| 72 | 68636 | <i>Rv0350</i> | <i>Mb0358</i> | VGDGEAGP |
| 73 | 70277 | <i>Rv0350</i> | <i>Mb0358</i> | VPEDTLNK |

|    |        |                |                |                                    |
|----|--------|----------------|----------------|------------------------------------|
| 74 | 72142  | <i>Rv0350</i>  | <i>Mb0358</i>  | VYQTEKVV                           |
| 75 | 73033  | <i>Rv0350</i>  | <i>Mb0358</i>  | WRIGYFGH                           |
| 76 | 73817  | <i>Rv0350</i>  | <i>Mb0358</i>  | YFGHQVGD                           |
| 77 | 75560  | <i>Rv0350</i>  | <i>Mb0358</i>  | YQTEKVVK                           |
| 78 | 120639 | <i>Rv0418</i>  | <i>Mb0426</i>  | IPVVSVTKSVGFQLRGQSGPTTVK           |
| 79 | 120810 | <i>Rv0418</i>  | <i>Mb0426</i>  | MVNKSRMMPAV                        |
| 80 | 9278   | <i>Rv0440</i>  | <i>Mb0448</i>  | DLSLLGKARKVVVTKD                   |
| 81 | 103346 | <i>Rv0440</i>  | <i>Mb0448</i>  | LEPGVVAEKVRNLPA                    |
| 82 | 103378 | <i>Rv0440</i>  | <i>Mb0448</i>  | LPLLEKVVIGAGKPLL                   |
| 83 | 103554 | <i>Rv0440</i>  | <i>Mb0448</i>  | RKVVVTKDETTIVEG                    |
| 84 | 103605 | <i>Rv0440</i>  | <i>Mb0448</i>  | SKVSTVKDLLPPLLEK                   |
| 85 | 103744 | <i>Rv0440</i>  | <i>Mb0448</i>  | YDREKLQERLAKLAG                    |
| 86 | 132976 | <i>Rv0440</i>  | <i>Mb0448</i>  | AASIAGLFL                          |
| 87 | 132994 | <i>Rv0440</i>  | <i>Mb0448</i>  | ALVREGLRNVAAG                      |
| 88 | 133264 | <i>Rv0440</i>  | <i>Mb0448</i>  | NTFGLQLEL                          |
| 89 | 175506 | <i>Rv0440</i>  | <i>Mb0448</i>  | TLVVNKIRGTFKSVAVKAPG               |
| 90 | 103143 | <i>Rv0447c</i> | <i>Mb0455c</i> | EMIEAVGYRSWPRYF                    |
| 91 | 103264 | <i>Rv0447c</i> | <i>Mb0455c</i> | HWLRPITPTFRPSWP                    |
| 92 | 103431 | <i>Rv0447c</i> | <i>Mb0455c</i> | MWELYLAYSEAGFRS                    |
| 93 | 94762  | <i>Rv0475</i>  | <i>Mb0485</i>  | AAPAKKAAPAKKAAA + METH(K179)       |
| 94 | 94763  | <i>Rv0475</i>  | <i>Mb0485</i>  | AAPAKKAAPAKKAAA + METH(K179, K180) |
| 95 | 122097 | <i>Rv0538</i>  | <i>Mb0552</i>  | FPGWQPGMPTIPTAPPTTPV               |
| 96 | 122140 | <i>Rv0538</i>  | <i>Mb0552</i>  | LQDSGVHDVAVISEAQATA                |
| 97 | 122143 | <i>Rv0538</i>  | <i>Mb0552</i>  | LSVVGDPDAPPTMVAVAPVA               |
| 98 | 122162 | <i>Rv0538</i>  | <i>Mb0552</i>  | PIPVPIIIPFPGWQPGMPT                |
| 99 | 103141 | <i>Rv0652</i>  | <i>Mb0671</i>  | EKVAKEAADEAKAKL                    |

|     |        |                |                |                           |
|-----|--------|----------------|----------------|---------------------------|
| 100 | 103165 | <i>Rv0652</i>  | <i>Mb0671</i>  | FEETFEVTAAAPVAV           |
| 101 | 103344 | <i>Rv0652</i>  | <i>Mb0671</i>  | LEAAGDKKIGVIKVV           |
| 102 | 103426 | <i>Rv0652</i>  | <i>Mb0671</i>  | MTLLELSDFVKKFEE           |
| 103 | 103589 | <i>Rv0652</i>  | <i>Mb0671</i>  | SEFDVILEAAGDKKI           |
| 104 | 103301 | <i>Rv0667</i>  | <i>Mb0686</i>  | KAMLFDGRSGEPFPY           |
| 105 | 103209 | <i>Rv0667</i>  | <i>Mb0686</i>  | GFSEIMRSTLEKDNT           |
| 106 | 103255 | <i>Rv0667</i>  | <i>Mb0686</i>  | HGTCANQCPIVDAGD           |
| 107 | 103361 | <i>Rv0667</i>  | <i>Mb0686</i>  | LLDIYRKLRPGEPT            |
| 108 | 103669 | <i>Rv0667</i>  | <i>Mb0686</i>  | TSEQIVERFGFSEIM           |
| 109 | 103716 | <i>Rv0667</i>  | <i>Mb0686</i>  | VRERMTTQDVEAITP           |
| 110 | 103037 | <i>Rv0668</i>  | <i>Mb0687</i>  | AKVRRERMGHIELAA           |
| 111 | 103078 | <i>Rv0668</i>  | <i>Mb0687</i>  | AYVITSVDEEMRHNE           |
| 112 | 103244 | <i>Rv0668</i>  | <i>Mb0687</i>  | GVPSRLGYLLDLAPK           |
| 113 | 103464 | <i>Rv0668</i>  | <i>Mb0687</i>  | PETINYRTLKPEKDG           |
| 114 | 121059 | <i>Rv0755c</i> | <i>Mb0777c</i> | VVHPAVVQANRVRTWLLAVSNVFGQ |
| 115 | 103198 | <i>Rv0916c</i> | <i>Mb0940c</i> | GDLPTIGTAVSARNT           |
| 116 | 103420 | <i>Rv0916c</i> | <i>Mb0940c</i> | MSFVTIQPVVLAAT            |
| 117 | 103055 | <i>Rv0928</i>  | <i>Mb0951</i>  | AQAQHLTMANIVTSA           |
| 118 | 103153 | <i>Rv0928</i>  | <i>Mb0951</i>  | ESGTTDNFQRYLQAA           |
| 119 | 103531 | <i>Rv0928</i>  | <i>Mb0951</i>  | QSGLDNGYIPIPDE            |
| 120 | 103577 | <i>Rv0928</i>  | <i>Mb0951</i>  | SAAAKNTPGSITYNE           |
| 121 | 103536 | <i>Rv0931c</i> | <i>Mb0955c</i> | QVGSQFGPYQLLRLL           |
| 122 | 103754 | <i>Rv0931c</i> | <i>Mb0955c</i> | YRADSVERLIAAHLM           |
| 123 | 103579 | <i>Rv0932c</i> | <i>Mb0956c</i> | SAERCGSPAIDLPTV           |
| 124 | 103462 | <i>Rv0932c</i> | <i>Mb0956c</i> | PDRSAERCGSPAIDL           |
| 125 | 103010 | <i>Rv0932c</i> | <i>Mb0956c</i> | ACGGGTNSSSSGAGG           |

|     |        |                |                |                       |
|-----|--------|----------------|----------------|-----------------------|
| 126 | 103230 | <i>Rv0932c</i> | <i>Mb0956c</i> | GPGQEGLDQYGS IPL      |
| 127 | 103493 | <i>Rv0932c</i> | <i>Mb0956c</i> | PPTPISVIFRSDKSG       |
| 128 | 103569 | <i>Rv0932c</i> | <i>Mb0956c</i> | RSCPGYTL DYNANGS      |
| 129 | 103738 | <i>Rv0932c</i> | <i>Mb0956c</i> | WSFAVGKQLNMAQII       |
| 130 | 103751 | <i>Rv0932c</i> | <i>Mb0956c</i> | YNANGSGAGVTQFLN       |
| 131 | 103061 | <i>Rv0934</i>  | <i>Mb0959</i>  | ASFLDQVHFQPLPPA       |
| 132 | 103227 | <i>Rv0934</i>  | <i>Mb0959</i>  | GNKASFLDQVHFQPL       |
| 133 | 9924   | <i>Rv0934</i>  | <i>Mb0959</i>  | DQVHFQPLPPAVVKLS DALI |
| 134 | 103633 | <i>Rv0934</i>  | <i>Mb0959</i>  | TAQTLQAFLHWAITD       |
| 135 | 7472   | <i>Rv0934</i>  | <i>Mb0959</i>  | DAATAQTLQAFLHWAITDGN  |
| 136 | 103659 | <i>Rv0934</i>  | <i>Mb0959</i>  | TLQAFLHWAITDGNK       |
| 137 | 120481 | <i>Rv0934</i>  | <i>Mb0959</i>  | EHLKLN GKVLAAMYQ      |
| 138 | 103373 | <i>Rv0934</i>  | <i>Mb0959</i>  | LPGVSEHLKLN GKVL      |
| 139 | 103004 | <i>Rv0934</i>  | <i>Mb0959</i>  | AAHKGLMNIALAISA       |
| 140 | 103018 | <i>Rv0934</i>  | <i>Mb0959</i>  | AFLHWAITDGNKASF       |
| 141 | 103021 | <i>Rv0934</i>  | <i>Mb0959</i>  | AGAGTVATTPASSPV       |
| 142 | 103029 | <i>Rv0934</i>  | <i>Mb0959</i>  | AGTVNIGASDAYLSE       |
| 143 | 103090 | <i>Rv0934</i>  | <i>Mb0959</i>  | CVAYIGISFLDQASQ       |
| 144 | 103105 | <i>Rv0934</i>  | <i>Mb0959</i>  | DGYPIINYEYAI VNN      |
| 145 | 103137 | <i>Rv0934</i>  | <i>Mb0959</i>  | EGWGKSPGFGTTVDF       |
| 146 | 103260 | <i>Rv0934</i>  | <i>Mb0959</i>  | HRSDGSGDTFLFTQY       |
| 147 | 103286 | <i>Rv0934</i>  | <i>Mb0959</i>  | ISMIDGPAPDGYPII       |
| 148 | 103304 | <i>Rv0934</i>  | <i>Mb0959</i>  | KGLMNIALAISAQQV       |
| 149 | 103349 | <i>Rv0934</i>  | <i>Mb0959</i>  | LGENGNGGMVTGCAE       |
| 150 | 103386 | <i>Rv0934</i>  | <i>Mb0959</i>  | LSEGDMAAHKGLMNI       |
| 151 | 103415 | <i>Rv0934</i>  | <i>Mb0959</i>  | MNIALAISAQQVNYN       |

|     |        |                |                |                           |
|-----|--------|----------------|----------------|---------------------------|
| 152 | 103516 | <i>Rv0934</i>  | <i>Mb0959</i>  | QDPEGWGKSPGFGTT           |
| 153 | 103547 | <i>Rv0934</i>  | <i>Mb0959</i>  | RGLGEAQLGNSSGNF           |
| 154 | 103747 | <i>Rv0934</i>  | <i>Mb0959</i>  | YIGISFLDQASQRGL           |
| 155 | 120511 | <i>Rv0956</i>  | <i>Mb0981</i>  | ETLHERIKVTERRLLVAAVAALATH |
| 156 | 120410 | <i>Rv0956</i>  | <i>Mb0981</i>  | ARLVVLASGTGSLLR           |
| 157 | 120537 | <i>Rv1114</i>  | <i>Mb1144</i>  | FPVVTHDEVLRRLVGRRRLWGRG   |
| 158 | 103365 | <i>Rv1196</i>  | <i>Mb1228</i>  | LMILIATNLLGQNTF           |
| 159 | 103503 | <i>Rv1196</i>  | <i>Mb1228</i>  | PVIAENRAELMILIA           |
| 160 | 103007 | <i>Rv1196</i>  | <i>Mb1228</i>  | AAQAVQTAAQNGVRA           |
| 161 | 103452 | <i>Rv1196</i>  | <i>Mb1228</i>  | NTPAIAVNEAEYEM            |
| 162 | 120569 | <i>Rv1382</i>  | <i>Mb1417</i>  | GSLIFAAVLVMLIAVLARLMMRGWR |
| 163 | 120912 | <i>Rv1382</i>  | <i>Mb1417</i>  | RGVAGKVVAGIGILAIRWRLPSGT  |
| 164 | 120802 | <i>Rv1434</i>  | <i>Mb1469</i>  | MRASPAERVDGAYAGAGPHTQSV   |
| 165 | 120399 | <i>Rv1582c</i> | <i>Mb1608c</i> | AIWRRIRVVPFEVVIPADEQD     |
| 166 | 103274 | <i>Rv1636</i>  | <i>Mb1662</i>  | ILKDESYKVTGTAPI           |
| 167 | 103620 | <i>Rv1636</i>  | <i>Mb1662</i>  | SVPANVSRRRAKVDVL          |
| 168 | 103694 | <i>Rv1636</i>  | <i>Mb1662</i>  | VGNVGLSTIAGRLLG           |
| 169 | 103425 | <i>Rv1690</i>  | <i>Mb1716</i>  | MTAHTHDGTRTWRTG           |
| 170 | 103434 | <i>Rv1690</i>  | <i>Mb1716</i>  | NAFLTALTNAGIAYD           |
| 171 | 103693 | <i>Rv1690</i>  | <i>Mb1716</i>  | VFGGAASCAAPIQAD           |
| 172 | 103128 | <i>Rv1793</i>  | <i>Mb1821</i>  | EAEHQAIVRDVLAAAG          |
| 173 | 103170 | <i>Rv1793</i>  | <i>Mb1821</i>  | FGDVDAHGAMIRAQA           |
| 174 | 103121 | <i>Rv1827</i>  | <i>Mb1858</i>  | DVGSLLNGTYVNREP           |
| 175 | 103291 | <i>Rv1827</i>  | <i>Mb1858</i>  | ITSAGRHPDSDIFLD           |
| 176 | 103347 | <i>Rv1837c</i> | <i>Mb1868c</i> | LFSRVEDVLGLPQNT           |
| 177 | 103636 | <i>Rv1837c</i> | <i>Mb1868c</i> | TCELFSRVEDVLGLP           |



|     |        |                |                |                            |
|-----|--------|----------------|----------------|----------------------------|
| 178 | 103641 | <i>Rv1837c</i> | <i>Mb1868c</i> | TDVIPETDGAKEGPT            |
| 179 | 103651 | <i>Rv1837c</i> | <i>Mb1868c</i> | TIEQLLTIPLAKELA            |
| 180 | 72741  | <i>Rv1862</i>  | <i>Mb1893</i>  | WLKLGLEFEGGVAKLNAEVMS      |
| 181 | 120392 | <i>Rv1866</i>  | <i>Mb1897</i>  | AAVQAAWAVLVAYFNRLRCGTGDY   |
| 182 | 120452 | <i>Rv1866</i>  | <i>Mb1897</i>  | DRYRHLVALSITDFGAAGRSSWRA   |
| 183 | 121017 | <i>Rv1866</i>  | <i>Mb1897</i>  | TTIFPDHVVGVRV GALLALAALHRD |
| 184 | 18898  | <i>Rv1886c</i> | <i>Mb1918c</i> | GCQTYKWETFLTSELPQWLS       |
| 185 | 10841  | <i>Rv1886c</i> | <i>Mb1918c</i> | DWYSPACGKAGCQTYKWETF       |
| 186 | 223    | <i>Rv1886c</i> | <i>Mb1918c</i> | AAIGLSMAGSSAMILAAYHP       |
| 187 | 503    | <i>Rv1886c</i> | <i>Mb1918c</i> | AAVVLPLVGLAGGAATAGA        |
| 188 | 1545   | <i>Rv1886c</i> | <i>Mb1918c</i> | AGGYKAADMWGPSSDPAWER       |
| 189 | 2695   | <i>Rv1886c</i> | <i>Mb1918c</i> | ALLDPSQGMGPSLIGLAMGD       |
| 190 | 3400   | <i>Rv1886c</i> | <i>Mb1918c</i> | ANRAVKPTGSAAIGLSMAGS       |
| 191 | 6323   | <i>Rv1886c</i> | <i>Mb1918c</i> | CGNGTPNELGGANIPAEFLE       |
| 192 | 8688   | <i>Rv1886c</i> | <i>Mb1918c</i> | DIKVQFQSGGNNSPAVYLLD       |
| 193 | 18700  | <i>Rv1886c</i> | <i>Mb1918c</i> | GANIPAEFLENFVRSSNLKF       |
| 194 | 21096  | <i>Rv1886c</i> | <i>Mb1918c</i> | GLRAQDDYNGWDINTPAFEW       |
| 195 | 21797  | <i>Rv1886c</i> | <i>Mb1918c</i> | GPSSDPAWERNDPTQQIPKL       |
| 196 | 34776  | <i>Rv1886c</i> | <i>Mb1918c</i> | LAGGAATAGAFSRPGLPVEY       |
| 197 | 40165  | <i>Rv1886c</i> | <i>Mb1918c</i> | LTSELPQWLSANRAVKPTGS       |
| 198 | 42790  | <i>Rv1886c</i> | <i>Mb1918c</i> | MTDVSRRKIRAWGRRMLIGTA      |
| 199 | 43332  | <i>Rv1886c</i> | <i>Mb1918c</i> | NAVFNFPPNGTHSWEYWGAQ       |
| 200 | 43514  | <i>Rv1886c</i> | <i>Mb1918c</i> | NDPTQQIPKLVANNTRLWVY       |
| 201 | 45250  | <i>Rv1886c</i> | <i>Mb1918c</i> | NNSPAVYLLDGLRAQDDYNG       |
| 202 | 48646  | <i>Rv1886c</i> | <i>Mb1918c</i> | PNGTHSWEYWGAQ              |
| 203 | 49421  | <i>Rv1886c</i> | <i>Mb1918c</i> | PSLIGLAMGDAGGYKAADMW       |

|     |        |                |                |                           |
|-----|--------|----------------|----------------|---------------------------|
| 204 | 49872  | <i>Rv1886c</i> | <i>Mb1918c</i> | PVGGQSSFYSDWYSPACGKA      |
| 205 | 50442  | <i>Rv1886c</i> | <i>Mb1918c</i> | QDAYNAAGGHNAVFNFPNG       |
| 206 | 52026  | <i>Rv1886c</i> | <i>Mb1918c</i> | QQFIYAGSLSALLDPSQGMG      |
| 207 | 56895  | <i>Rv1886c</i> | <i>Mb1918c</i> | SAMILAAYHPQQFIYAGSLS      |
| 208 | 64079  | <i>Rv1886c</i> | <i>Mb1918c</i> | THSWEYWGAQLNAMKGDLS       |
| 209 | 67697  | <i>Rv1886c</i> | <i>Mb1918c</i> | VANNTRLWVYCGNGTPNELG      |
| 210 | 72314  | <i>Rv1886c</i> | <i>Mb1918c</i> | WDINTPAFEWYYQSGLSIVM      |
| 211 | 72515  | <i>Rv1886c</i> | <i>Mb1918c</i> | WGRRLMIGTAAAVVLPGLVG      |
| 212 | 76584  | <i>Rv1886c</i> | <i>Mb1918c</i> | YYQSGLSIVMPVGGQSSFYS      |
| 213 | 103272 | <i>Rv1886c</i> | <i>Mb1918c</i> | IGLSMAGSSAMILAA           |
| 214 | 103457 | <i>Rv1886c</i> | <i>Mb1918c</i> | PAEFLENFVRSSNLK           |
| 215 | 103530 | <i>Rv1886c</i> | <i>Mb1918c</i> | QSGGNNSPAVYLLDG           |
| 216 | 103532 | <i>Rv1886c</i> | <i>Mb1918c</i> | QSSFYSDWYSPACGK           |
| 217 | 103578 | <i>Rv1886c</i> | <i>Mb1918c</i> | SAAIGLSMAGSSAMI           |
| 218 | 103668 | <i>Rv1886c</i> | <i>Mb1918c</i> | TSELPQWLSANRAVK           |
| 219 | 103729 | <i>Rv1886c</i> | <i>Mb1918c</i> | WGPSSDPAWERNDPT           |
| 220 | 103732 | <i>Rv1886c</i> | <i>Mb1918c</i> | WLSANRAVKPTGSAA           |
| 221 | 103067 | <i>Rv1926c</i> | <i>Mb1961c</i> | ATIPQGEQSTGKIYF           |
| 222 | 103283 | <i>Rv1926c</i> | <i>Mb1961c</i> | IRGSVTPAVSQFNAR           |
| 223 | 103355 | <i>Rv1926c</i> | <i>Mb1961c</i> | LGWKVSDLKSSTAVI           |
| 224 | 103479 | <i>Rv1926c</i> | <i>Mb1961c</i> | PGYPVAGQVWEATAT           |
| 225 | 103501 | <i>Rv1926c</i> | <i>Mb1961c</i> | PVAGQVWEATATVNA           |
| 226 | 103537 | <i>Rv1926c</i> | <i>Mb1961c</i> | QVVLGWKVSDLKSST           |
| 227 | 120441 | <i>Rv1979c</i> | <i>Mb2001c</i> | DKVLPLVAIVVSVGLAVSYD      |
| 228 | 120788 | <i>Rv1979c</i> | <i>Mb2001c</i> | LTFLGFIGVLLAINLFGNRAIKWAN |
| 229 | 22997  | <i>Rv1980c</i> | <i>Mb2002c</i> | GVIFFFNPGELLPEA           |

|     |        |                |                   |                          |
|-----|--------|----------------|-------------------|--------------------------|
| 230 | 24522  | <i>Rv1980c</i> | <i>Mb2002c</i>    | HPTTTYKAFDWDQAYRKPIT     |
| 231 | 44381  | <i>Rv1980c</i> | <i>Mb2002c</i>    | NITSATYQSAIPPRGTQAVV     |
| 232 | 103145 | <i>Rv1980c</i> | <i>Mb2002c</i>    | ENYIAQTRDKFLSAA          |
| 233 | 103525 | <i>Rv1980c</i> | <i>Mb2002c</i>    | QNAGGTHPTTTYKAF          |
| 234 | 103635 | <i>Rv1980c</i> | <i>Mb2002c</i>    | TAVVLLCCSGVATAA          |
| 235 | 103661 | <i>Rv1980c</i> | <i>Mb2002c</i>    | TNDGVIFFFNPCELL          |
| 236 | 103327 | <i>Rv1984c</i> | <i>Mb2006c</i>    | KTINLCAPDDPICTG          |
| 237 | 103348 | <i>Rv1984c</i> | <i>Mb2006c</i>    | LGDVGEAFVDSLTSQ          |
| 238 | 103686 | <i>Rv1984c</i> | <i>Mb2006c</i>    | VALFGEPSSGFSSML          |
| 239 | 120777 | <i>Rv1986</i>  | <i>Mb2008</i>     | LPVVALCTVSDIVLIAAGIAGFGA |
| 240 | 20662  | <i>Rv2031c</i> | <i>Mb2057c</i>    | GKPTEKHIQIRSTN           |
| 241 | 53355  | <i>Rv2031c</i> | <i>Mb2057c</i>    | RDGQLTIKAERTEQKDFDGR     |
| 242 | 56043  | <i>Rv2031c</i> | <i>Mb2057c</i>    | RTEQKDFDGRSEFAYGSFVR     |
| 243 | 67156  | <i>Rv2031c</i> | <i>Mb2057c</i>    | TVSLPVGAEDEDDIKATYDKG    |
| 244 | 103130 | <i>Rv2031c</i> | <i>Mb2057c</i>    | EDEMKEGRYEVRAEL          |
| 245 | 103180 | <i>Rv2031c</i> | <i>Mb2057c</i>    | FPSFAGLRPTFDTRL          |
| 246 | 103718 | <i>Rv2031c</i> | <i>Mb2057c</i>    | VSVAVSEGKPKTEKHI         |
| 247 | 103266 | <i>Rv2185c</i> | <i>Mb2207c</i>    | IADIEAYPQWISEYK          |
| 248 | 103731 | <i>Rv2185c</i> | <i>Mb2207c</i>    | WISEYKEVEILEADD          |
| 249 | 103296 | <i>Rv2246</i>  | <i>Mb2270</i>     | IVMSTNNDDPAGACR          |
| 250 | 120892 | <i>Rv2346c</i> | <i>Mb2375c</i>    | QKVQAAGNNMAQT            |
| 251 | 21765  | <i>Rv2351c</i> | <i>no existed</i> | GPRLYGEMTMQGRKPRPSGP     |
| 252 | 27635  | <i>Rv2351c</i> | <i>no existed</i> | INFNCEVWSNVSETISGPRLY    |
| 253 | 41948  | <i>Rv2351c</i> | <i>no existed</i> | MLGNAPSVPNTTLGM          |
| 254 | 66693  | <i>Rv2351c</i> | <i>no existed</i> | TTLGMHCGSFGSAPSNG        |
| 255 | 4556   | <i>Rv2351c</i> | <i>no existed</i> | ASMLGTVTNSPGVPAVPWGA     |

|     |        |                |                |                                      |
|-----|--------|----------------|----------------|--------------------------------------|
| 256 | 103737 | <i>Rv2430c</i> | <i>Mb2456c</i> | WRSLDVEMTAVQRSF                      |
| 257 | 103338 | <i>Rv2453c</i> | <i>Mb2480c</i> | LAPDTVPLAGVVLG                       |
| 258 | 103472 | <i>Rv2453c</i> | <i>Mb2480c</i> | PGGTTTTLVEHMGIL                      |
| 259 | 103548 | <i>Rv2453c</i> | <i>Mb2480c</i> | RGLRAAAEAGVRLAF                      |
| 260 | 103687 | <i>Rv2453c</i> | <i>Mb2480c</i> | VCAVDMPYLTVELIE                      |
| 261 | 9474   | <i>Rv2608</i>  | <i>Mb2640</i>  | DNIGNANIGFGN                         |
| 262 | 9475   | <i>Rv2608</i>  | <i>Mb2640</i>  | DNIGNANIGFGNRGDANIGIGNIGDRNLGIGNTGNW |
| 263 | 10022  | <i>Rv2608</i>  | <i>Mb2640</i>  | DRNLGIGNTGNW                         |
| 264 | 20281  | <i>Rv2608</i>  | <i>Mb2640</i>  | GIGNIGDRNLGI                         |
| 265 | 21497  | <i>Rv2608</i>  | <i>Mb2640</i>  | GNPNRPDGGILT                         |
| 266 | 39354  | <i>Rv2608</i>  | <i>Mb2640</i>  | LSFTLTGNPNRP                         |
| 267 | 44231  | <i>Rv2608</i>  | <i>Mb2640</i>  | NIGFGNRGDANI                         |
| 268 | 53833  | <i>Rv2608</i>  | <i>Mb2640</i>  | RGDANIGIGNIG                         |
| 269 | 55157  | <i>Rv2608</i>  | <i>Mb2640</i>  | RPGLDELSFTLT                         |
| 270 | 55158  | <i>Rv2608</i>  | <i>Mb2640</i>  | RPGLDELSFTLTGNPNRPDGGILT             |
| 271 | 103393 | <i>Rv2608</i>  | <i>Mb2640</i>  | LTTYILLPSQDLPLL                      |
| 272 | 103116 | <i>Rv2626c</i> | <i>Mb2659c</i> | DSIYYVDANASIQEM                      |
| 273 | 103197 | <i>Rv2626c</i> | <i>Mb2659c</i> | GDDRLHGMLTDRDI                       |
| 274 | 103247 | <i>Rv2629</i>  | <i>Mb2662</i>  | GYPVHKPVTAGWNGY                      |
| 275 | 103162 | <i>Rv2780</i>  | <i>Mb2803</i>  | FCGRIHTRYSSAYEL                      |
| 276 | 103002 | <i>Rv2873</i>  | <i>Mb2898</i>  | AAASLAAIAIAFLAG                      |
| 277 | 103118 | <i>Rv2873</i>  | <i>Mb2898</i>  | DTLNGGEYTVFAPT                       |
| 278 | 103262 | <i>Rv2873</i>  | <i>Mb2898</i>  | HVIAGQASPSRIDGT                      |
| 279 | 103267 | <i>Rv2873</i>  | <i>Mb2898</i>  | IAFLAGCSSTKPVSQ                      |
| 280 | 103000 | <i>Rv2875</i>  | <i>Mb2900</i>  | AAAGDLVGPGEAIEYA                     |
| 281 | 103199 | <i>Rv2875</i>  | <i>Mb2900</i>  | GDLVGPGEAIEYAAAN                     |

|     |        |                |                |                 |
|-----|--------|----------------|----------------|-----------------|
| 282 | 103720 | <i>Rv2875</i>  | <i>Mb2900</i>  | VTVTGQGNSLKVGN  |
| 283 | 103195 | <i>Rv2875</i>  | <i>Mb2900</i>  | GASVTVTGQGNSLKV |
| 284 | 103082 | <i>Rv2875</i>  | <i>Mb2900</i>  | CGGVSTANATVYMID |
| 285 | 103746 | <i>Rv2875</i>  | <i>Mb2900</i>  | YHVVAGQTSPANVVG |
| 286 | 103339 | <i>Rv2940c</i> | <i>Mb2965c</i> | LASTLTDALKSHGPQ |
| 287 | 103185 | <i>Rv2940c</i> | <i>Mb2965c</i> | FRMELLSLPQDEWAG |
| 288 | 103246 | <i>Rv2940c</i> | <i>Mb2965c</i> | GYIPILGAPWLADLV |
| 289 | 103384 | <i>Rv2940c</i> | <i>Mb2965c</i> | LQAHPHAVNGTAMRE |
| 290 | 103476 | <i>Rv2940c</i> | <i>Mb2965c</i> | PGQGAYAAANSWVDV |
| 291 | 103480 | <i>Rv2940c</i> | <i>Mb2965c</i> | PILGAPWLADLVRRS |
| 292 | 103490 | <i>Rv2940c</i> | <i>Mb2965c</i> | PPGYDITALLQAHPH |
| 293 | 103612 | <i>Rv2940c</i> | <i>Mb2965c</i> | SPHPLLTHAVEQTGR |
| 294 | 103629 | <i>Rv2940c</i> | <i>Mb2965c</i> | TAALRAAEDDCPPPG |
| 295 | 103700 | <i>Rv2940c</i> | <i>Mb2965c</i> | VHNVAALPGAAYCEM |
| 296 | 103125 | <i>Rv2941</i>  | <i>Mb2966</i>  | DVVQHVARRPGESPP |
| 297 | 103756 | <i>Rv2941</i>  | <i>Mb2966</i>  | YTFKEDEYPSTAYLQ |
| 298 | 103017 | <i>Rv2957</i>  | <i>Mb2981</i>  | AFDLDRLLFKRNICH |
| 299 | 103031 | <i>Rv2958c</i> | <i>Mb2982c</i> | AIANAYWSPQARRRF |
| 300 | 103179 | <i>Rv2958c</i> | <i>Mb2982c</i> | FPHHPIHTVPSEEV  |
| 301 | 103566 | <i>Rv2958c</i> | <i>Mb2982c</i> | RRFPLPDVPWTRFFG |
| 302 | 103677 | <i>Rv2958c</i> | <i>Mb2982c</i> | TVIAATAGRNHLKNV |
| 303 | 103703 | <i>Rv2958c</i> | <i>Mb2982c</i> | VLCNGGSPPTQQALA |
| 304 | 103112 | <i>Rv2962c</i> | <i>Mb2986c</i> | DPRYNQLLGLPFRH  |
| 305 | 103549 | <i>Rv2962c</i> | <i>Mb2986c</i> | RHGLSSLGWNLCRIF |
| 306 | 103717 | <i>Rv2962c</i> | <i>Mb2986c</i> | VRRRHGLSSLGWNLC |
| 307 | 103755 | <i>Rv2962c</i> | <i>Mb2986c</i> | YRLERPLLALQCM   |

|     |        |                |                |                           |
|-----|--------|----------------|----------------|---------------------------|
| 308 | 120587 | <i>Rv2994</i>  | <i>Mb3018</i>  | HSLWIGVFLFLGGMAAGGCNS     |
| 309 | 120630 | <i>Rv2994</i>  | <i>Mb3018</i>  | IMIVSLGVTASSFLFINGVAFLIPR |
| 310 | 120878 | <i>Rv2994</i>  | <i>Mb3018</i>  | PSWGLVVTMFAWGYLLDHVGERMV  |
| 311 | 120961 | <i>Rv2994</i>  | <i>Mb3018</i>  | SPYRGSSILWRIHAASALLMMP    |
| 312 | 121057 | <i>Rv2994</i>  | <i>Mb3018</i>  | VTVTFMLVWLINHHGWSVAQ      |
| 313 | 103359 | <i>Rv3133c</i> | <i>Mb3157c</i> | LILTSYTSDEAMLDA           |
| 314 | 120904 | <i>Rv3219</i>  | <i>Mb3245</i>  | RALKRRNARTKAR             |
| 315 | 103403 | <i>Rv3221c</i> | <i>Mb3247c</i> | MAEDVRAEIVASVLE           |
| 316 | 103708 | <i>Rv3221c</i> | <i>Mb3247c</i> | VLLESMKMEIPVLAE           |
| 317 | 103102 | <i>Rv3339c</i> | <i>Mb3371c</i> | DEMTRVIWKLKIDML           |
| 318 | 103297 | <i>Rv3339c</i> | <i>Mb3371c</i> | IWKLIKDMLILPYLD           |
| 319 | 103432 | <i>Rv3339c</i> | <i>Mb3371c</i> | MWLSPNGTIRNILGG           |
| 320 | 103352 | <i>Rv3347c</i> | <i>Mb3380c</i> | LGGGVGAFLNALFAG           |
| 321 | 103038 | <i>Rv3347c</i> | <i>Mb3380c</i> | ALMSGNFNNGILWRG           |
| 322 | 22387  | <i>Rv3347c</i> | <i>Mb3379c</i> | GSINTGWFNTGNANTG          |
| 323 | 103022 | <i>Rv3347c</i> | <i>Mb3380c</i> | AGFTAPATLLSALG            |
| 324 | 103469 | <i>Rv3347c</i> | <i>Mb3380c</i> | PFNVNLKLQFLHDAF           |
| 325 | 103645 | <i>Rv3347c</i> | <i>Mb3379c</i> | TGGGGGSGFSNSGSG           |
| 326 | 19562  | <i>Rv3347c</i> | <i>Mb3379c</i> | GFKVRPSFSFFAVGPDGMP       |
| 327 | 103482 | <i>Rv3347c</i> | <i>Mb3380c</i> | PLDTPPAPAPPPFRL           |
| 328 | 103664 | <i>Rv3347c</i> | <i>Mb3380c</i> | TPPAPAPPPFRLPLL           |
| 329 | 103534 | <i>Rv3354</i>  | <i>Mb3389</i>  | QSVCPILAEPPGGSFN          |
| 330 | 4132   | <i>Rv3418c</i> | <i>Mb3452c</i> | ARDVLAVVSK                |
| 331 | 8900   | <i>Rv3418c</i> | <i>Mb3452c</i> | DKILVQANEAETTTA           |
| 332 | 14574  | <i>Rv3418c</i> | <i>Mb3452c</i> | ETTTASGLVIPDTAK           |
| 333 | 35316  | <i>Rv3418c</i> | <i>Mb3452c</i> | LDVAEGDTVIYSKYG           |

|     |        |                |                |                        |
|-----|--------|----------------|----------------|------------------------|
| 334 | 41071  | <i>Rv3418c</i> | <i>Mb3452c</i> | MAKVNIKPLEDKILV        |
| 335 | 47209  | <i>Rv3418c</i> | <i>Mb3452c</i> | PDTAKEKPQEGTVVA        |
| 336 | 72294  | <i>Rv3418c</i> | <i>Mb3452c</i> | WDEDGEKRIPLDVAE        |
| 337 | 103013 | <i>Rv3418c</i> | <i>Mb3452c</i> | AEGDTVIYSKYGGTE        |
| 338 | 103695 | <i>Rv3418c</i> | <i>Mb3452c</i> | VGPGRWDEDGEKRIP        |
| 339 | 120887 | <i>Rv3736</i>  | <i>Mb3763</i>  | QDVGNYDAFISIRAAIRAIESA |
| 340 | 433    | <i>Rv3763</i>  | <i>Mb3789</i>  | AASGPKVVIDGKDQNVTVGSV  |
| 341 | 4334   | <i>Rv3763</i>  | <i>Mb3789</i>  | ASATKDGSHYKITGTATGVD   |
| 342 | 4990   | <i>Rv3763</i>  | <i>Mb3789</i>  | ATGVDMANPMSPVNKSFEIE   |
| 343 | 8464   | <i>Rv3763</i>  | <i>Mb3789</i>  | DGNPPEVKSVGLGNVNGVTL   |
| 344 | 25315  | <i>Rv3763</i>  | <i>Mb3789</i>  | IAIGGAATGIAAVLTDGNPP   |
| 345 | 42633  | <i>Rv3763</i>  | <i>Mb3789</i>  | MSPVNKSFEIEVTCS        |
| 346 | 58022  | <i>Rv3763</i>  | <i>Mb3789</i>  | SGETTTAAGTTASPGAASGP   |
| 347 | 67607  | <i>Rv3763</i>  | <i>Mb3789</i>  | VAGLSGCSSNKSTTGSETT    |
| 348 | 71346  | <i>Rv3763</i>  | <i>Mb3789</i>  | VTGSVVCTTAAGNVNIAIGG   |
| 349 | 105967 | <i>Rv3763</i>  | <i>Mb3789</i>  | MKRGLTVAVAGAAILVAGLS   |
| 350 | 105976 | <i>Rv3763</i>  | <i>Mb3789</i>  | NGVTLGYTSGTCQGNASATK   |
| 351 | 38439  | <i>Rv3803c</i> | <i>Mb3833c</i> | LPDWLAANRGLAPGG        |
| 352 | 46806  | <i>Rv3803c</i> | <i>Mb3833c</i> | PAGGAYSMYTNWEQD        |
| 353 | 1522   | <i>Rv3804c</i> | <i>Mb3834c</i> | AGGGHNGVDFPDSG         |
| 354 | 3402   | <i>Rv3804c</i> | <i>Mb3834c</i> | ANRHVKPTGSAVVGL        |
| 355 | 17838  | <i>Rv3804c</i> | <i>Mb3834c</i> | FSRPLPVEYLQVPSPSMGR    |
| 356 | 39011  | <i>Rv3804c</i> | <i>Mb3834c</i> | LQVPSPSMGRDIKVQFQSGG   |
| 357 | 49333  | <i>Rv3804c</i> | <i>Mb3834c</i> | PSDLGGNNLPAKFLE        |
| 358 | 51790  | <i>Rv3804c</i> | <i>Mb3834c</i> | QPACRKAGCQTYKWE        |
| 359 | 70010  | <i>Rv3804c</i> | <i>Mb3834c</i> | VMPVGGQSSFYSWDWY       |

|     |        |               |               |                      |
|-----|--------|---------------|---------------|----------------------|
| 360 | 98793  | <i>Rv3841</i> | <i>Mb3871</i> | GEQFMQWFLQEQIEEVALMA |
| 361 | 98906  | <i>Rv3841</i> | <i>Mb3871</i> | MLVQHLLDRDLRVEIPGVDI |
| 362 | 103697 | <i>Rv3864</i> | <i>Mb3894</i> | VGQVTATMGQLQQLV      |
| 363 | 103176 | <i>Rv3864</i> | <i>Mb3894</i> | FLGGFAGLPSLGFGN      |
| 364 | 103331 | <i>Rv3864</i> | <i>Mb3894</i> | LAALPDFLGGFAGLP      |
| 365 | 103510 | <i>Rv3864</i> | <i>Mb3894</i> | QAQLISSQAQQGGQQ      |
| 366 | 103245 | <i>Rv3864</i> | <i>Mb3894</i> | GVYKVCKGLEKIPLL      |
| 367 | 103340 | <i>Rv3864</i> | <i>Mb3894</i> | LCKTTSNFIWGQLLL      |
| 368 | 103649 | <i>Rv3864</i> | <i>Mb3894</i> | TGNMISNQAKYVSDI      |
| 369 | 187    | <i>Rv3874</i> | <i>Mb3904</i> | AAGTAAQAAVRFQE       |
| 370 | 655    | <i>Rv3874</i> | <i>Mb3904</i> | ADEEQQQALSSQMGF      |
| 371 | 3934   | <i>Rv3874</i> | <i>Mb3904</i> | AQAAVRFQEAAANKQ      |
| 372 | 21422  | <i>Rv3874</i> | <i>Mb3904</i> | GNFERISGDLKTQID      |
| 373 | 28505  | <i>Rv3874</i> | <i>Mb3904</i> | ISGDLKTQIDQVEST      |
| 374 | 32971  | <i>Rv3874</i> | <i>Mb3904</i> | KQELDEISTNIRQAG      |
| 375 | 33831  | <i>Rv3874</i> | <i>Mb3904</i> | KTQIDQVESTAGSLQ      |
| 376 | 34927  | <i>Rv3874</i> | <i>Mb3904</i> | LAQEAGNFERISGDL      |
| 377 | 37040  | <i>Rv3874</i> | <i>Mb3904</i> | LKTQIDQVESTAG        |
| 378 | 41028  | <i>Rv3874</i> | <i>Mb3904</i> | MAEMKTDAAATLAQEA     |
| 379 | 50549  | <i>Rv3874</i> | <i>Mb3904</i> | QEAGNFERISGDLKT      |
| 380 | 103519 | <i>Rv3874</i> | <i>Mb3904</i> | QGQWRGAAGTAAQAA      |
| 381 | 120421 | <i>Rv3874</i> | <i>Mb3904</i> | AVVRFQEAAANKQK       |
| 382 | 60     | <i>Rv3875</i> | <i>Mb3905</i> | AAASAIQGNVTSIHSL     |
| 383 | 35139  | <i>Rv3875</i> | <i>Mb3905</i> | LDEGKQSLTKLAAAWG     |
| 384 | 46500  | <i>Rv3875</i> | <i>Mb3905</i> | NVTSIHSLLDGKQSL      |
| 385 | 52048  | <i>Rv3875</i> | <i>Mb3905</i> | QQKWDATATELNN        |



|     |        |                |                |                      |
|-----|--------|----------------|----------------|----------------------|
| 386 | 61578  | <i>Rv3875</i>  | <i>Mb3905</i>  | STEGNVTGMFA          |
| 387 | 120550 | <i>Rv3878</i>  | <i>Mb3908</i>  | GDVQPAEVVAAAR        |
| 388 | 120870 | <i>Rv3879c</i> | <i>Mb3909c</i> | PHVKPAALAEQPG        |
| 389 | 103371 | <i>Rv3881c</i> | <i>Mb3911c</i> | LPADTAAQLTSAGRE      |
| 390 | 103208 | <i>Rv3881c</i> | <i>Mb3911c</i> | GFLMPPSDGSGVTPG      |
| 391 | 103258 | <i>Rv3881c</i> | <i>Mb3911c</i> | HQGQGGAKSKGSQQE      |
| 392 | 103511 | <i>Rv3881c</i> | <i>Mb3911c</i> | QAQYVAQLHVWARRE      |
| 393 | 120408 | <i>Rv3883c</i> | <i>Mb3913c</i> | APYNVRRLLPPPVEP      |
| 394 | 120428 | <i>Rv3883c</i> | <i>Mb3913c</i> | DDLVGAGVIDAVA        |
| 395 | 98728  | <i>Rv3914</i>  | <i>Mb3945</i>  | DFWATWCGPCKMVAPVLEEI |
| 396 | 98784  | <i>Rv3914</i>  | <i>Mb3945</i>  | GAKGKAALLRELSDVVPLN  |
| 397 | 98852  | <i>Rv3914</i>  | <i>Mb3945</i>  | KMVAPVLEEIATERATDLTV |
| 398 | 103284 | <i>Rv3922c</i> | <i>Mb3953c</i> | IRLAKCGPWHRGGWD      |
| 399 | 103385 | <i>Rv3922c</i> | <i>Mb3953c</i> | LRPASCRFVPTCSQY      |

Table S3 Functional classification of genes coding B cell epitope

| H37Rv gene     | <i>M. bovis</i> Gene | Gene Category                |
|----------------|----------------------|------------------------------|
| <i>Rv0287</i>  | <i>Mb0295</i>        | cell wall and cell processes |
| <i>Rv0288</i>  | <i>Mb0296</i>        | cell wall and cell processes |
| <i>Rv0418</i>  | <i>Mb0426</i>        | cell wall and cell processes |
| <i>Rv0475</i>  | <i>Mb0485</i>        | cell wall and cell processes |
| <i>Rv0538</i>  | <i>Mb0552</i>        | cell wall and cell processes |
| <i>Rv0928</i>  | <i>Mb0951</i>        | cell wall and cell processes |
| <i>Rv0932c</i> | <i>Mb0956c</i>       | cell wall and cell processes |
| <i>Rv0934</i>  | <i>Mb0959</i>        | cell wall and cell processes |
| <i>Rv1382</i>  | <i>Mb1417</i>        | cell wall and cell processes |

|                |                |                              |
|----------------|----------------|------------------------------|
| <i>Rv1690</i>  | <i>Mb1716</i>  | cell wall and cell processes |
| <i>Rv1793</i>  | <i>Mb1821</i>  | cell wall and cell processes |
| <i>Rv1926c</i> | <i>Mb1961c</i> | cell wall and cell processes |
| <i>Rv1979c</i> | <i>Mb2001c</i> | cell wall and cell processes |
| <i>Rv1980c</i> | <i>Mb2002c</i> | cell wall and cell processes |
| <i>Rv1984c</i> | <i>Mb2006c</i> | cell wall and cell processes |
| <i>Rv1986</i>  | <i>Mb2008</i>  | cell wall and cell processes |
| <i>Rv2346c</i> | <i>Mb2375c</i> | cell wall and cell processes |
| <i>Rv2873</i>  | <i>Mb2898</i>  | cell wall and cell processes |
| <i>Rv2875</i>  | <i>Mb2900</i>  | cell wall and cell processes |
| <i>Rv2994</i>  | <i>Mb3018</i>  | cell wall and cell processes |
| <i>Rv3763</i>  | <i>Mb3789</i>  | cell wall and cell processes |
| <i>Rv3864</i>  | <i>Mb3894</i>  | cell wall and cell processes |
| <i>Rv3874</i>  | <i>Mb3904</i>  | cell wall and cell processes |
| <i>Rv3875</i>  | <i>Mb3905</i>  | cell wall and cell processes |
| <i>Rv3878</i>  | <i>Mb3908</i>  | cell wall and cell processes |
| <i>Rv3879c</i> | <i>Mb3909c</i> | cell wall and cell processes |
| <i>Rv3881c</i> | <i>Mb3911c</i> | cell wall and cell processes |
| <i>Rv1434</i>  | <i>Mb1469</i>  | conserved hypotheticals      |
| <i>Rv1827</i>  | <i>Mb1858</i>  | conserved hypotheticals      |
| <i>Rv2185c</i> | <i>Mb2207c</i> | conserved hypotheticals      |
| <i>Rv2626c</i> | <i>Mb2659c</i> | conserved hypotheticals      |
| <i>Rv2629</i>  | <i>Mb2662</i>  | conserved hypotheticals      |
| <i>Rv3354</i>  | <i>Mb3389</i>  | conserved hypotheticals      |
| <i>Rv0652</i>  | <i>Mb0671</i>  | information pathways         |
| <i>Rv0667</i>  | <i>Mb0686</i>  | information pathways         |

|                |                   |                                         |
|----------------|-------------------|-----------------------------------------|
| <i>Rv0668</i>  | <i>Mb0687</i>     | information pathways                    |
| <i>Rv1582c</i> | <i>Mb1608c</i>    | insertion seqs and phages               |
| <i>Rv0066c</i> | <i>Mb0067c</i>    | intermediary metabolism and respiration |
| <i>Rv0125</i>  | <i>Mb0130</i>     | intermediary metabolism and respiration |
| <i>Rv0315</i>  | <i>Mb0323</i>     | intermediary metabolism and respiration |
| <i>Rv0956</i>  | <i>Mb0981</i>     | intermediary metabolism and respiration |
| <i>Rv1837c</i> | <i>Mb1868c</i>    | intermediary metabolism and respiration |
| <i>Rv1862</i>  | <i>Mb1893</i>     | intermediary metabolism and respiration |
| <i>Rv2351c</i> | <i>no existed</i> | intermediary metabolism and respiration |
| <i>Rv2453c</i> | <i>Mb2480c</i>    | intermediary metabolism and respiration |
| <i>Rv2780</i>  | <i>Mb2803</i>     | intermediary metabolism and respiration |
| <i>Rv2957</i>  | <i>Mb2981</i>     | intermediary metabolism and respiration |
| <i>Rv2958c</i> | <i>Mb2982c</i>    | intermediary metabolism and respiration |
| <i>Rv2962c</i> | <i>Mb2986c</i>    | intermediary metabolism and respiration |
| <i>Rv3339c</i> | <i>Mb3371c</i>    | intermediary metabolism and respiration |
| <i>Rv3841</i>  | <i>Mb3871</i>     | intermediary metabolism and respiration |
| <i>Rv3883c</i> | <i>Mb3913c</i>    | intermediary metabolism and respiration |
| <i>Rv3914</i>  | <i>Mb3945</i>     | intermediary metabolism and respiration |
| <i>Rv0447c</i> | <i>Mb0455c</i>    | lipid metabolism                        |
| <i>Rv1866</i>  | <i>Mb1897</i>     | lipid metabolism                        |
| <i>Rv1886c</i> | <i>Mb1918c</i>    | lipid metabolism                        |
| <i>Rv2246</i>  | <i>Mb2270</i>     | lipid metabolism                        |
| <i>Rv2940c</i> | <i>Mb2965c</i>    | lipid metabolism                        |
| <i>Rv2941</i>  | <i>Mb2966</i>     | lipid metabolism                        |
| <i>Rv3221c</i> | <i>Mb3247c</i>    | lipid metabolism                        |
| <i>Rv3803c</i> | <i>Mb3833c</i>    | lipid metabolism                        |

|                |                        |                                       |
|----------------|------------------------|---------------------------------------|
| <i>Rv3804c</i> | <i>Mb3834c</i>         | lipid metabolism                      |
| <i>Rv0755c</i> | <i>Mb0777c</i>         | PE/PPE                                |
| <i>Rv0916c</i> | <i>Mb0940c</i>         | PE/PPE                                |
| <i>Rv1196</i>  | <i>Mb1228</i>          | PE/PPE                                |
| <i>Rv2430c</i> | <i>Mb2456c</i>         | PE/PPE                                |
| <i>Rv2608</i>  | <i>Mb2640</i>          | PE/PPE                                |
| <i>Rv3347c</i> | <i>Mb3379c/Mb3380c</i> | PE/PPE                                |
| <i>Rv0931c</i> | <i>Mb0955c</i>         | regulatory proteins                   |
| <i>Rv3133c</i> | <i>Mb3157c</i>         | regulatory proteins                   |
| <i>Rv3219</i>  | <i>Mb3245</i>          | regulatory proteins                   |
| <i>Rv3736</i>  | <i>Mb3763</i>          | regulatory proteins                   |
| <i>Rv0169</i>  | <i>Mb0175</i>          | virulence, detoxification, adaptation |
| <i>Rv0251c</i> | <i>Mb0257c</i>         | virulence, detoxification, adaptation |
| <i>Rv0350</i>  | <i>Mb0358</i>          | virulence, detoxification, adaptation |
| <i>Rv0440</i>  | <i>Mb0448</i>          | virulence, detoxification, adaptation |
| <i>Rv1114</i>  | <i>Mb1144</i>          | virulence, detoxification, adaptation |
| <i>Rv1636</i>  | <i>Mb1662</i>          | virulence, detoxification, adaptation |
| <i>Rv2031c</i> | <i>Mb2057c</i>         | virulence, detoxification, adaptation |
| <i>Rv3418c</i> | <i>Mb3452c</i>         | virulence, detoxification, adaptation |
| <i>Rv3922c</i> | <i>Mb3953c</i>         | virulence, detoxification, adaptation |

Table S4 B cell epitopes grouping in BCGs

| Group | Epitope ID | Characteristic     |
|-------|------------|--------------------|
| 1     | 103203     | present in 13 BCGs |
| 1     | 103328     | present in 13 BCGs |
| 1     | 103550     | present in 13 BCGs |

|   |        |                    |
|---|--------|--------------------|
| 1 | 103745 | present in 13 BCGs |
| 1 | 103113 | present in 13 BCGs |
| 1 | 103680 | present in 13 BCGs |
| 1 | 103040 | present in 13 BCGs |
| 1 | 103544 | present in 13 BCGs |
| 1 | 103580 | present in 13 BCGs |
| 1 | 38988  | present in 13 BCGs |
| 1 | 103042 | present in 13 BCGs |
| 1 | 103043 | present in 13 BCGs |
| 1 | 819    | present in 13 BCGs |
| 1 | 11021  | present in 13 BCGs |
| 1 | 948    | present in 13 BCGs |
| 1 | 1634   | present in 13 BCGs |
| 1 | 1676   | present in 13 BCGs |
| 1 | 4364   | present in 13 BCGs |
| 1 | 7474   | present in 13 BCGs |
| 1 | 9268   | present in 13 BCGs |
| 1 | 10406  | present in 13 BCGs |
| 1 | 11057  | present in 13 BCGs |
| 1 | 11451  | present in 13 BCGs |
| 1 | 12182  | present in 13 BCGs |
| 1 | 12688  | present in 13 BCGs |
| 1 | 15991  | present in 13 BCGs |
| 1 | 18764  | present in 13 BCGs |
| 1 | 19202  | present in 13 BCGs |
| 1 | 20060  | present in 13 BCGs |

|   |       |                    |
|---|-------|--------------------|
| 1 | 20174 | present in 13 BCGs |
| 1 | 21653 | present in 13 BCGs |
| 1 | 22332 | present in 13 BCGs |
| 1 | 22398 | present in 13 BCGs |
| 1 | 22912 | present in 13 BCGs |
| 1 | 23337 | present in 13 BCGs |
| 1 | 24658 | present in 13 BCGs |
| 1 | 26348 | present in 13 BCGs |
| 1 | 30877 | present in 13 BCGs |
| 1 | 34154 | present in 13 BCGs |
| 1 | 38259 | present in 13 BCGs |
| 1 | 39216 | present in 13 BCGs |
| 1 | 40649 | present in 13 BCGs |
| 1 | 44613 | present in 13 BCGs |
| 1 | 47260 | present in 13 BCGs |
| 1 | 47769 | present in 13 BCGs |
| 1 | 52501 | present in 13 BCGs |
| 1 | 52698 | present in 13 BCGs |
| 1 | 54157 | present in 13 BCGs |
| 1 | 57244 | present in 13 BCGs |
| 1 | 57981 | present in 13 BCGs |
| 1 | 58963 | present in 13 BCGs |
| 1 | 63420 | present in 13 BCGs |
| 1 | 64980 | present in 13 BCGs |
| 1 | 67616 | present in 13 BCGs |
| 1 | 68636 | present in 13 BCGs |

|   |        |                    |
|---|--------|--------------------|
| 1 | 70277  | present in 13 BCGs |
| 1 | 72142  | present in 13 BCGs |
| 1 | 73033  | present in 13 BCGs |
| 1 | 73817  | present in 13 BCGs |
| 1 | 75560  | present in 13 BCGs |
| 1 | 120639 | present in 13 BCGs |
| 1 | 120810 | present in 13 BCGs |
| 1 | 9278   | present in 13 BCGs |
| 1 | 103346 | present in 13 BCGs |
| 1 | 103378 | present in 13 BCGs |
| 1 | 103554 | present in 13 BCGs |
| 1 | 103605 | present in 13 BCGs |
| 1 | 103744 | present in 13 BCGs |
| 1 | 132976 | present in 13 BCGs |
| 1 | 132994 | present in 13 BCGs |
| 1 | 133264 | present in 13 BCGs |
| 1 | 175506 | present in 13 BCGs |
| 1 | 103143 | present in 13 BCGs |
| 1 | 103264 | present in 13 BCGs |
| 1 | 103431 | present in 13 BCGs |
| 1 | 122097 | present in 13 BCGs |
| 1 | 122140 | present in 13 BCGs |
| 1 | 122143 | present in 13 BCGs |
| 1 | 122162 | present in 13 BCGs |
| 1 | 103141 | present in 13 BCGs |
| 1 | 103165 | present in 13 BCGs |

|   |        |                    |
|---|--------|--------------------|
| 1 | 103344 | present in 13 BCGs |
| 1 | 103426 | present in 13 BCGs |
| 1 | 103589 | present in 13 BCGs |
| 1 | 103301 | present in 13 BCGs |
| 1 | 103209 | present in 13 BCGs |
| 1 | 103255 | present in 13 BCGs |
| 1 | 103361 | present in 13 BCGs |
| 1 | 103669 | present in 13 BCGs |
| 1 | 103716 | present in 13 BCGs |
| 1 | 103037 | present in 13 BCGs |
| 1 | 103078 | present in 13 BCGs |
| 1 | 103244 | present in 13 BCGs |
| 1 | 103464 | present in 13 BCGs |
| 1 | 121059 | present in 13 BCGs |
| 1 | 103198 | present in 13 BCGs |
| 1 | 103420 | present in 13 BCGs |
| 1 | 103055 | present in 13 BCGs |
| 1 | 103153 | present in 13 BCGs |
| 1 | 103531 | present in 13 BCGs |
| 1 | 103577 | present in 13 BCGs |
| 1 | 103536 | present in 13 BCGs |
| 1 | 103754 | present in 13 BCGs |
| 1 | 103010 | present in 13 BCGs |
| 1 | 103230 | present in 13 BCGs |
| 1 | 103493 | present in 13 BCGs |
| 1 | 103569 | present in 13 BCGs |



|   |        |                    |
|---|--------|--------------------|
| 1 | 103738 | present in 13 BCGs |
| 1 | 103751 | present in 13 BCGs |
| 1 | 103004 | present in 13 BCGs |
| 1 | 103018 | present in 13 BCGs |
| 1 | 103021 | present in 13 BCGs |
| 1 | 103029 | present in 13 BCGs |
| 1 | 103090 | present in 13 BCGs |
| 1 | 103105 | present in 13 BCGs |
| 1 | 103137 | present in 13 BCGs |
| 1 | 103260 | present in 13 BCGs |
| 1 | 103286 | present in 13 BCGs |
| 1 | 103304 | present in 13 BCGs |
| 1 | 103349 | present in 13 BCGs |
| 1 | 103386 | present in 13 BCGs |
| 1 | 103415 | present in 13 BCGs |
| 1 | 103516 | present in 13 BCGs |
| 1 | 103547 | present in 13 BCGs |
| 1 | 103747 | present in 13 BCGs |
| 1 | 120410 | present in 13 BCGs |
| 1 | 120537 | present in 13 BCGs |
| 1 | 103452 | present in 13 BCGs |
| 1 | 120569 | present in 13 BCGs |
| 1 | 120912 | present in 13 BCGs |
| 1 | 120802 | present in 13 BCGs |
| 1 | 103274 | present in 13 BCGs |
| 1 | 103620 | present in 13 BCGs |

|   |        |                    |
|---|--------|--------------------|
| 1 | 103694 | present in 13 BCGs |
| 1 | 103425 | present in 13 BCGs |
| 1 | 103434 | present in 13 BCGs |
| 1 | 103693 | present in 13 BCGs |
| 1 | 103128 | present in 13 BCGs |
| 1 | 103170 | present in 13 BCGs |
| 1 | 103121 | present in 13 BCGs |
| 1 | 103291 | present in 13 BCGs |
| 1 | 103347 | present in 13 BCGs |
| 1 | 103636 | present in 13 BCGs |
| 1 | 103641 | present in 13 BCGs |
| 1 | 103651 | present in 13 BCGs |
| 1 | 72741  | present in 13 BCGs |
| 1 | 120392 | present in 13 BCGs |
| 1 | 120452 | present in 13 BCGs |
| 1 | 121017 | present in 13 BCGs |
| 1 | 223    | present in 13 BCGs |
| 1 | 503    | present in 13 BCGs |
| 1 | 1545   | present in 13 BCGs |
| 1 | 2695   | present in 13 BCGs |
| 1 | 3400   | present in 13 BCGs |
| 1 | 6323   | present in 13 BCGs |
| 1 | 8688   | present in 13 BCGs |
| 1 | 18700  | present in 13 BCGs |
| 1 | 21096  | present in 13 BCGs |
| 1 | 21797  | present in 13 BCGs |

|   |        |                    |
|---|--------|--------------------|
| 1 | 34776  | present in 13 BCGs |
| 1 | 40165  | present in 13 BCGs |
| 1 | 42790  | present in 13 BCGs |
| 1 | 43332  | present in 13 BCGs |
| 1 | 43514  | present in 13 BCGs |
| 1 | 45250  | present in 13 BCGs |
| 1 | 48646  | present in 13 BCGs |
| 1 | 49421  | present in 13 BCGs |
| 1 | 49872  | present in 13 BCGs |
| 1 | 50442  | present in 13 BCGs |
| 1 | 52026  | present in 13 BCGs |
| 1 | 56895  | present in 13 BCGs |
| 1 | 64079  | present in 13 BCGs |
| 1 | 67697  | present in 13 BCGs |
| 1 | 72314  | present in 13 BCGs |
| 1 | 72515  | present in 13 BCGs |
| 1 | 76584  | present in 13 BCGs |
| 1 | 103272 | present in 13 BCGs |
| 1 | 103457 | present in 13 BCGs |
| 1 | 103530 | present in 13 BCGs |
| 1 | 103532 | present in 13 BCGs |
| 1 | 103578 | present in 13 BCGs |
| 1 | 103668 | present in 13 BCGs |
| 1 | 103729 | present in 13 BCGs |
| 1 | 103732 | present in 13 BCGs |
| 1 | 103067 | present in 13 BCGs |

|   |        |                    |
|---|--------|--------------------|
| 1 | 103283 | present in 13 BCGs |
| 1 | 103355 | present in 13 BCGs |
| 1 | 103479 | present in 13 BCGs |
| 1 | 103501 | present in 13 BCGs |
| 1 | 103537 | present in 13 BCGs |
| 1 | 20662  | present in 13 BCGs |
| 1 | 53355  | present in 13 BCGs |
| 1 | 56043  | present in 13 BCGs |
| 1 | 67156  | present in 13 BCGs |
| 1 | 103130 | present in 13 BCGs |
| 1 | 103180 | present in 13 BCGs |
| 1 | 103718 | present in 13 BCGs |
| 1 | 103731 | present in 13 BCGs |
| 1 | 103296 | present in 13 BCGs |
| 1 | 103338 | present in 13 BCGs |
| 1 | 103472 | present in 13 BCGs |
| 1 | 103548 | present in 13 BCGs |
| 1 | 103687 | present in 13 BCGs |
| 1 | 9474   | present in 13 BCGs |
| 1 | 9475   | present in 13 BCGs |
| 1 | 10022  | present in 13 BCGs |
| 1 | 20281  | present in 13 BCGs |
| 1 | 21497  | present in 13 BCGs |
| 1 | 39354  | present in 13 BCGs |
| 1 | 44231  | present in 13 BCGs |
| 1 | 53833  | present in 13 BCGs |

|   |        |                    |
|---|--------|--------------------|
| 1 | 55157  | present in 13 BCGs |
| 1 | 55158  | present in 13 BCGs |
| 1 | 103393 | present in 13 BCGs |
| 1 | 103116 | present in 13 BCGs |
| 1 | 103197 | present in 13 BCGs |
| 1 | 103247 | present in 13 BCGs |
| 1 | 103162 | present in 13 BCGs |
| 1 | 103002 | present in 13 BCGs |
| 1 | 103118 | present in 13 BCGs |
| 1 | 103262 | present in 13 BCGs |
| 1 | 103267 | present in 13 BCGs |
| 1 | 103082 | present in 13 BCGs |
| 1 | 103746 | present in 13 BCGs |
| 1 | 103185 | present in 13 BCGs |
| 1 | 103246 | present in 13 BCGs |
| 1 | 103384 | present in 13 BCGs |
| 1 | 103476 | present in 13 BCGs |
| 1 | 103480 | present in 13 BCGs |
| 1 | 103490 | present in 13 BCGs |
| 1 | 103612 | present in 13 BCGs |
| 1 | 103629 | present in 13 BCGs |
| 1 | 103700 | present in 13 BCGs |
| 1 | 103125 | present in 13 BCGs |
| 1 | 103756 | present in 13 BCGs |
| 1 | 103017 | present in 13 BCGs |
| 1 | 103031 | present in 13 BCGs |

|   |        |                    |
|---|--------|--------------------|
| 1 | 103179 | present in 13 BCGs |
| 1 | 103566 | present in 13 BCGs |
| 1 | 103677 | present in 13 BCGs |
| 1 | 103703 | present in 13 BCGs |
| 1 | 103112 | present in 13 BCGs |
| 1 | 103549 | present in 13 BCGs |
| 1 | 103717 | present in 13 BCGs |
| 1 | 103755 | present in 13 BCGs |
| 1 | 120587 | present in 13 BCGs |
| 1 | 120630 | present in 13 BCGs |
| 1 | 120878 | present in 13 BCGs |
| 1 | 120961 | present in 13 BCGs |
| 1 | 121057 | present in 13 BCGs |
| 1 | 103359 | present in 13 BCGs |
| 1 | 103403 | present in 13 BCGs |
| 1 | 103708 | present in 13 BCGs |
| 1 | 103102 | present in 13 BCGs |
| 1 | 103297 | present in 13 BCGs |
| 1 | 103432 | present in 13 BCGs |
| 1 | 103022 | present in 13 BCGs |
| 1 | 103469 | present in 13 BCGs |
| 1 | 103645 | present in 13 BCGs |
| 1 | 19562  | present in 13 BCGs |
| 1 | 103482 | present in 13 BCGs |
| 1 | 103664 | present in 13 BCGs |
| 1 | 103534 | present in 13 BCGs |

|   |        |                    |
|---|--------|--------------------|
| 1 | 4132   | present in 13 BCGs |
| 1 | 8900   | present in 13 BCGs |
| 1 | 14574  | present in 13 BCGs |
| 1 | 35316  | present in 13 BCGs |
| 1 | 41071  | present in 13 BCGs |
| 1 | 47209  | present in 13 BCGs |
| 1 | 72294  | present in 13 BCGs |
| 1 | 103013 | present in 13 BCGs |
| 1 | 103695 | present in 13 BCGs |
| 1 | 120887 | present in 13 BCGs |
| 1 | 433    | present in 13 BCGs |
| 1 | 4334   | present in 13 BCGs |
| 1 | 4990   | present in 13 BCGs |
| 1 | 8464   | present in 13 BCGs |
| 1 | 25315  | present in 13 BCGs |
| 1 | 42633  | present in 13 BCGs |
| 1 | 58022  | present in 13 BCGs |
| 1 | 67607  | present in 13 BCGs |
| 1 | 71346  | present in 13 BCGs |
| 1 | 105967 | present in 13 BCGs |
| 1 | 105976 | present in 13 BCGs |
| 1 | 38439  | present in 13 BCGs |
| 1 | 46806  | present in 13 BCGs |
| 1 | 1522   | present in 13 BCGs |
| 1 | 3402   | present in 13 BCGs |
| 1 | 17838  | present in 13 BCGs |

|   |        |                    |
|---|--------|--------------------|
| 1 | 39011  | present in 13 BCGs |
| 1 | 49333  | present in 13 BCGs |
| 1 | 51790  | present in 13 BCGs |
| 1 | 70010  | present in 13 BCGs |
| 1 | 98793  | present in 13 BCGs |
| 1 | 98906  | present in 13 BCGs |
| 1 | 103697 | present in 13 BCGs |
| 1 | 103176 | present in 13 BCGs |
| 1 | 103331 | present in 13 BCGs |
| 1 | 103510 | present in 13 BCGs |
| 1 | 103245 | present in 13 BCGs |
| 1 | 103340 | present in 13 BCGs |
| 1 | 103649 | present in 13 BCGs |
| 1 | 103208 | present in 13 BCGs |
| 1 | 103258 | present in 13 BCGs |
| 1 | 103511 | present in 13 BCGs |
| 1 | 120408 | present in 13 BCGs |
| 1 | 120428 | present in 13 BCGs |
| 1 | 98728  | present in 13 BCGs |
| 1 | 98784  | present in 13 BCGs |
| 1 | 98852  | present in 13 BCGs |
| 1 | 103284 | present in 13 BCGs |
| 1 | 103385 | present in 13 BCGs |
| 1 | 63850  | present in 13 BCGs |
| 1 | 25138  | present in 13 BCGs |
| 1 | 61020  | present in 13 BCGs |



|   |        |                             |
|---|--------|-----------------------------|
| 1 | 20198  | present in 13 BCGs          |
| 1 | 61340  | present in 13 BCGs          |
| 1 | 55967  | present in 13 BCGs          |
| 1 | 71325  | present in 13 BCGs          |
| 1 | 7311   | present in 13 BCGs          |
| 1 | 103339 | present in 13 BCGs          |
| 2 | 103579 | changed in 13 BCGs          |
| 2 | 103462 | changed in 13 BCGs          |
| 2 | 103061 | changed in 13 BCGs          |
| 2 | 103227 | changed in 13 BCGs          |
| 2 | 9924   | A point mutation in 13 BCGs |
| 2 | 120511 | A point mutation in 13 BCGs |
| 2 | 103365 | 2 SNPs in 13 BCGs           |
| 2 | 103503 | 2 SNPs in 13 BCGs           |
| 2 | 103007 | 3 SNPs in 13 BCGs           |
| 2 | 18898  | A point mutation in 13 BCGs |
| 2 | 10841  | A point mutation in 13 BCGs |
| 2 | 103266 | A point mutation in 13 BCGs |
| 2 | 120892 | A point mutation in 13 BCGs |
| 2 | 103352 | A point mutation in 13 BCGs |
| 2 | 103038 | 9 SNPs in 13 BCGs           |
| 3 | 120399 | lost in 13 BCGs             |
| 3 | 21765  | lost in 13 BCGs             |
| 3 | 27635  | lost in 13 BCGs             |
| 3 | 41948  | lost in 13 BCGs             |
| 3 | 66693  | lost in 13 BCGs             |

|   |        |                 |
|---|--------|-----------------|
| 3 | 4556   | lost in 13 BCGs |
| 3 | 187    | lost in 13 BCGs |
| 3 | 655    | lost in 13 BCGs |
| 3 | 3934   | lost in 13 BCGs |
| 3 | 21422  | lost in 13 BCGs |
| 3 | 28505  | lost in 13 BCGs |
| 3 | 32971  | lost in 13 BCGs |
| 3 | 33831  | lost in 13 BCGs |
| 3 | 34927  | lost in 13 BCGs |
| 3 | 37040  | lost in 13 BCGs |
| 3 | 41028  | lost in 13 BCGs |
| 3 | 50549  | lost in 13 BCGs |
| 3 | 103519 | lost in 13 BCGs |
| 3 | 120421 | lost in 13 BCGs |
| 3 | 60     | lost in 13 BCGs |
| 3 | 35139  | lost in 13 BCGs |
| 3 | 46500  | lost in 13 BCGs |
| 3 | 52048  | lost in 13 BCGs |
| 3 | 61578  | lost in 13 BCGs |
| 3 | 120550 | lost in 13 BCGs |
| 3 | 120870 | lost in 13 BCGs |
| 4 | 120441 | lost in 8 BCGs  |
| 4 | 120788 | lost in 8 BCGs  |
| 4 | 22997  | lost in 8 BCGs  |
| 4 | 24522  | lost in 8 BCGs  |
| 4 | 44381  | lost in 8 BCGs  |

|   |        |                                                                            |
|---|--------|----------------------------------------------------------------------------|
| 4 | 103145 | lost in 8 BCGs                                                             |
| 4 | 103525 | lost in 8 BCGs                                                             |
| 4 | 103635 | lost in 8 BCGs                                                             |
| 4 | 103661 | lost in 8 BCGs                                                             |
| 4 | 103327 | lost in 8 BCGs                                                             |
| 4 | 103348 | lost in 8 BCGs                                                             |
| 4 | 103686 | lost in 8 BCGs                                                             |
| 4 | 120777 | lost in 8 BCGs                                                             |
| 5 | 41952  | lost in BCG-Swedens                                                        |
| 5 | 53107  | lost in BCG-Phipps                                                         |
| 5 | 53303  | 5 base deletion in BCG-Phipps                                              |
| 5 | 73020  | 2 base deletion in BCG-Phipps                                              |
| 5 | 48905  | 11 base deletion in BCG-Phipps                                             |
| 5 | 6825   | 8 base deletion in BCG-Phipps                                              |
| 5 | 49246  | 14 base deletion in BCG-Phipps                                             |
| 5 | 55523  | lost in BCG-Phipps                                                         |
| 5 | 55706  | 17 base deletion in BCG-Phipps                                             |
| 5 |        | A point mutation in BCG-Moreau, BCG-Russia and BCG-Tice, 3 SNPs and 3 base |
| 5 | 94762  | deletion in BCG-Prague                                                     |
| 5 | 120904 | lost in BCG-Phipps, 21 base deletion in BCG-Prague                         |
| 5 | 22387  | A point mutation in BCG-Phipps, BCG-Prague, BCG-Russia, BCG-Tice           |
| 5 | 103371 | A point mutation in BCG-Glaxo                                              |
| 5 | 103633 | Single-base insert in BCG-Phipps                                           |
| 5 | 7472   | Single-base insert in BCG-Phipps                                           |
| 5 | 103659 | Single-base insert in BCG-Phipps                                           |
| 5 | 120481 | Single base deletion in BCG-Moreau                                         |

|   |        |                                    |
|---|--------|------------------------------------|
| 5 | 103373 | Single base deletion in BCG-Moreau |
| 5 | 103737 | Single base deletion in BCG-Moreau |
| 5 | 103000 | 17 base deletion in BCG-Prague     |
| 5 | 103199 | 8 base deletion in BCG-Prague      |
| 5 | 103720 | Single base deletion in BCG-Moreau |
| 5 | 103195 | Single base deletion in BCG-Moreau |

---
